# Supplementary material for: N‐Terminal Pro Brain, N‐Terminal Pro Atrial Natriuretic Peptides, and Dynamic Cerebral Autoregulation
Source: PubMed Central journal article supplement — J Am Heart Assoc. 2020 Oct 16;9(20):e018203. doi: 10.1161/JAHA.120.018203 (PMC7763392; doi:10.1161/jaha.120.018203), 2020-10-16
Supplement: JAH3-9-e018203-s001.pdf [file JAH3-9-e018203-s001.pdf]

# **SUPPLEMENTAL MATERIAL**

**Table S1. Comparison between the participants from Chicago field center and those included in this study.**

|                                     | Included in this study |                | <i>p</i> -value |
|-------------------------------------|------------------------|----------------|-----------------|
|                                     | No<br>(n=591)          | Yes<br>(n=154) |                 |
| <b>Demographics at Y30</b>          |                        |                |                 |
| Age, y                              | 55 ± 4                 | 54 ± 4         | 0.080           |
| Female, %                           | 60                     | 45             | <0.001          |
| Blacks, %                           | 46                     | 46             | 0.954           |
| <b>Risk Factors at Y30</b>          |                        |                |                 |
| SBP, mmHG                           | 120 ± 17               | 120 ± 15       | 0.107           |
| DBP, mmHG                           | 73 ± 11                | 74 ± 11        | 0.887           |
| Body Mass Index, kg/m <sup>2</sup>  | 30 ± 7                 | 30 ± 6         | 0.003           |
| Total cholesterol, mg/dL            | 189 ± 37               | 192 ± 38       | 0.976           |
| History of diabetes, %              | 16                     | 16             | 0.871           |
| History of HTN, %                   | 40                     | 33             | 0.131           |
| Current Smoker, %                   | 15                     | 14             | 0.990           |
| History of cardiac problem, No. (%) | 13                     | 12             | 0.705           |
| Renal history, No. (%)              | 9                      | 8              | 0.595           |

Data are expressed as mean±SD or %. Characteristics were compared using t-test for continuous variables and chi-squared test for categorical variables. Chicago cohort had a total of 1108 participants at baseline. A total of 745 participants attended the Y30 follow-up examination (n=64 death before Y30 examination).

**Table S2. Characteristics of participants in thirds of NTproBNP.**

|                                                | NTproBNP (pg/ml) thirds    |                                 |                                | p-value <sup>a</sup> |
|------------------------------------------------|----------------------------|---------------------------------|--------------------------------|----------------------|
|                                                | Low<br>(5.0-21.97)<br>n=51 | Middle<br>(22.02-45.35)<br>n=52 | High<br>(45.72-273.50)<br>n=51 |                      |
| <b>Demographics at Year 25</b>                 |                            |                                 |                                |                      |
| Age, y, mean (SD)                              | 49.5 (3.9)                 | 48.8 (3.9)                      | 49.9 (3.8)                     | 0.316                |
| Females, No. (%)                               | 10 (19.6)                  | 19 (36.5)                       | 40 (78.4)                      | <0.001               |
| Blacks, No. (%)                                | 24 (47.1)                  | 24 (46.2)                       | 22 (43.1)                      | 0.917                |
| <b>Risk Factors at Year 25</b>                 |                            |                                 |                                |                      |
| SBP, mmHG, mean (SD)                           | 116.5 (9.6)                | 118.8 (11.0)                    | 117.2 (20.0)                   | 0.704                |
| DBP, mmHG, mean (SD)                           | 73.4 (9.2)                 | 74.0 (10.4)                     | 73.8 (15.4)                    | 0.975                |
| Body Mass Index, kg/m <sup>2</sup> , mean (SD) | 30.2 (5.7)                 | 27.9 (5.0)                      | 29.5 (6.8)                     | 0.143                |
| Total cholesterol, mg/dL, mean (SD)            | 190.6 (34.2)               | 193.2 (42.6)                    | 193.4 (35.3)                   | 0.917                |
| History of diabetes, No. (%)                   | 7 (13.7)                   | 5 (9.6)                         | 8 (15.7)                       | 0.645                |
| History of hypertension, No. (%)               | 15 (29.4)                  | 15 (29.0)                       | 13 (26.0)                      | 0.892                |
| Current Smoker, No. (%)                        | 9 (17.6)                   | 8 (16.0)                        | 9 (17.6)                       | 0.151                |
| History of cardiac problem, No. (%)            | 8 (15.7)                   | 5 (9.6)                         | 6 (11.8)                       | 0.637                |
| Renal history, No. (%)                         | 5 (9.8)                    | 5 (9.6)                         | 0                              | 0.071                |

<sup>a</sup>p-values were calculated using one-way ANOVA or chi-squared test were appropriate. Abbreviations: SBP: systolic blood pressure and DBP: diastolic blood pressure

**Table S3. Characteristics of participants in thirds of proANP.**

|                                                | NT-proANP (nmol/L) thirds |                             |                           | <i>p</i> -value <sup>a</sup> |
|------------------------------------------------|---------------------------|-----------------------------|---------------------------|------------------------------|
|                                                | Low<br>0.18-1.09<br>n=52  | Middle<br>1.10-1.63<br>n=51 | High<br>1.64-3.07<br>n=51 |                              |
| <b>Demographics at Year 25</b>                 |                           |                             |                           |                              |
| Age, y, mean (SD)                              | 48.4 (4.1)                | 49.6 (3.5)                  | 50.3 (3.8)                | 0.038                        |
| Female, No. (%)                                | 17 (32.7)                 | 26 (51.0)                   | 26 (51.0)                 | 0.097                        |
| Blacks, No. (%)                                | 26 (50.0)                 | 22 (43.1)                   | 22 (43.1)                 | 0.721                        |
| <b>Risk Factors at Year 25</b>                 |                           |                             |                           |                              |
| SBP, mmHG, mean (SD)                           | 118.4 (11.0)              | 116.6 (11.0)                | 117.6 (19.2)              | 0.810                        |
| DBP, mmHG, mean (SD)                           | 75.5 (10.6)               | 73.0 (9.8)                  | 72.7 (14.7)               | 0.426                        |
| Body Mass Index, kg/m <sup>2</sup> , mean (SD) | 29.5 (6.2)                | 29.0 (5.3)                  | 29.0 (6.3)                | 0.892                        |
| Total cholesterol, mg/dL, mean (SD)            | 191.1 (41.8)              | 197.1 (35.0)                | 189.1 (35.1)              | 0.532                        |
| History of hypertension, No. (%)               | 17 (32.7)                 | 12 (23.5)                   | 14 (27.5)                 | 0.582                        |
| History of diabetes, No. (%)                   | 11 (21.2)                 | 4 (7.8)                     | 5 (9.8)                   | 0.094                        |
| Current Smoker, No. (%)                        | 13 (25.5)                 | 6 (12.0)                    | 7 (13.7)                  | 0.206                        |
| History of cardiac problem, No. (%)            | 10 (19.2)                 | 9 (17.6)                    | 0                         | 0.005                        |
| Renal history, No. (%)                         | 3 (5.8)                   | 3 (5.9)                     | 4 (7.8)                   | 0.892                        |

<sup>a</sup>*p*-values were calculated using one-way ANOVA or chi-squared test were appropriate. Abbreviations: SBP: systolic blood pressure and DBP: diastolic blood pressure

**Figure S1. Flowchart of included participants in this study.**

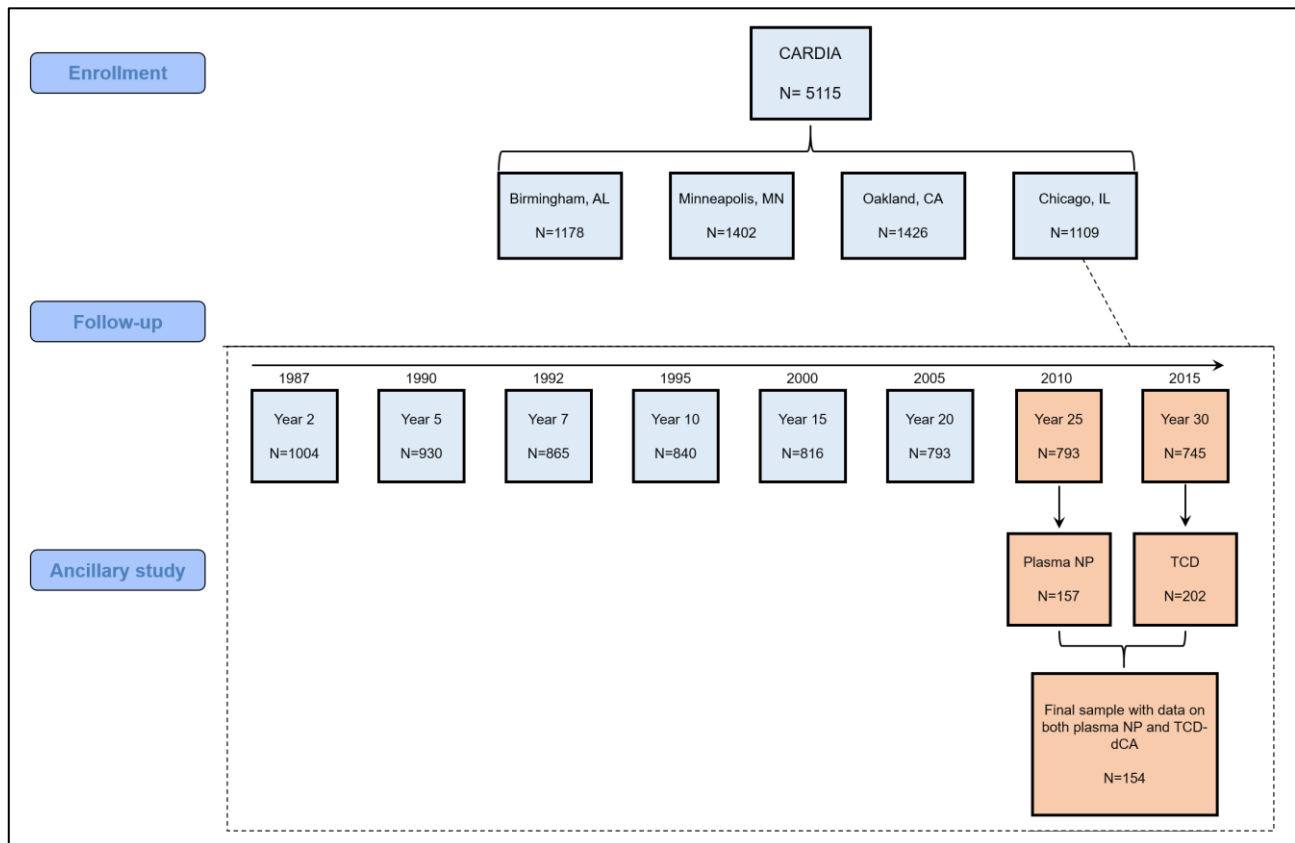

The CARDIA cohort enrolled 5115 adults aged 18-30 years beginning 1986 from four U.S. cities of Birmingham, Chicago, Minneapolis and Oakland. These participants were followed for 30 years through 8 in-person follow-up visits after 2, 5, 7, 10, 15, 20, 25 and 30 years. The current study includes a subset of participants from the Chicago center at year 25 and year 30 examinations. NP: natriuretic peptides; TCD: transcranial Doppler; dCA: dynamic cerebral autoregulation.
